# Supplementary material for: Targeting cytokine-induced leukemic stem cell persistence in chronic myeloid leukemia by IKK2-inhibition
Source: PubMed Central journal article supplement — Haematologica. 2022 Dec 1;108(4):1179–85. doi: 10.3324/haematol.2022.280922 (PMC10071114; doi:10.3324/haematol.2022.280922), 2022-12-01
Supplement: 2022_280922_BUTOW_SUPPL.pdf [file 2022_280922_BUTOW_SUPPL.pdf]

# Targeting cytokine-induced leukemic stem cell persistence in chronic myeloid leukemia by IKK2-inhibition

Marlena Bütow,<sup>1,2</sup> Fabio J. Testaquadra,<sup>1,2</sup> Julian Baumeister,<sup>1,2</sup> Tiago Maié,<sup>3</sup> Nicolas Chatain,<sup>1,2</sup> Timo Jaquet,<sup>1,2</sup> Stefan Tillmann,<sup>1,2</sup> Martina Crysandt,<sup>1,2</sup> Ivan G. Costa,<sup>3</sup> Tim H. Brümmendorf<sup>1,2</sup> and Mirle Schemionek<sup>1,2</sup>

<sup>1</sup>Department of Hematology, Oncology, Hemostaseology, and Stem Cell Transplantation, Faculty of Medicine, RWTH Aachen University;

<sup>2</sup>Center for Integrated Oncology Aachen Bonn Cologne Düsseldorf (CIO ABCD) and <sup>3</sup>Institute for Computational Genomics, Joint Research Center for Computational Biomedicine, RWTH Aachen University, Aachen, Germany

Correspondence: M. SCHEMIONEK-REINDERS - [mschemionek@ukaachen.de](mailto:mschemionek@ukaachen.de)

<https://doi.org/10.3324/haematol.2022.280922>

## Supplementary Appendix

# Targeting cytokine-induced leukemic stem cell persistence in chronic myeloid leukemia by IKK2-inhibition

Marlena Bütow<sup>1,2</sup>, Fabio J. Testaquadra<sup>1,2</sup>, Julian Baumeister<sup>1,2</sup>, Tiago Maié<sup>3</sup>, Nicolas Chatain<sup>1,2</sup>, Timo Jaquet<sup>1,2</sup>, Stefan Tillmann<sup>1,2</sup>, Martina Crysandt<sup>1,2</sup>, Ivan G. Costa<sup>3</sup>, Tim H. Brümmendorf<sup>1,2</sup>, Mirle Schemionek<sup>1,2</sup>

<sup>1</sup>Department of Hematology, Oncology, Hemostaseology, and Stem Cell Transplantation, Faculty of Medicine, RWTH Aachen University, Aachen, Germany, <sup>2</sup>Center for Integrated Oncology Aachen Bonn Cologne Düsseldorf (CIO ABCD), Aachen, Germany, <sup>3</sup>Institute for Computational Genomics, Joint Research Center for Computational Biomedicine, RWTH Aachen University, Aachen, Germany

**A**

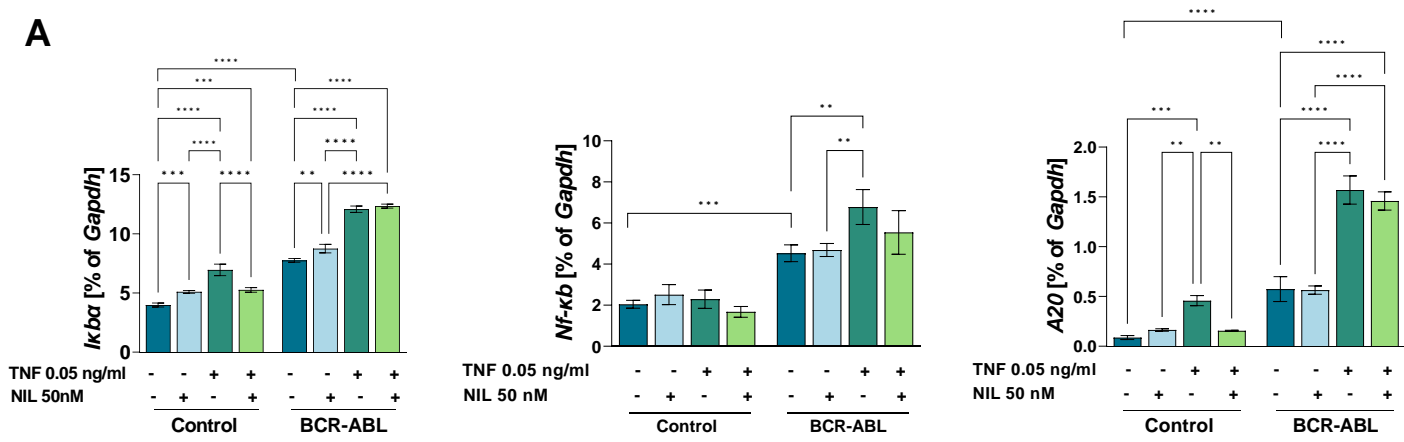

**B**

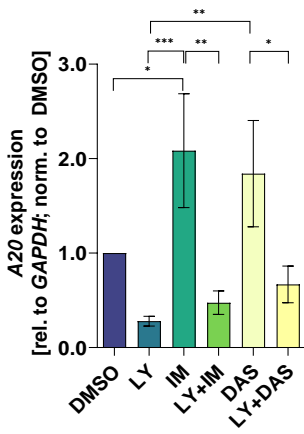

**C**

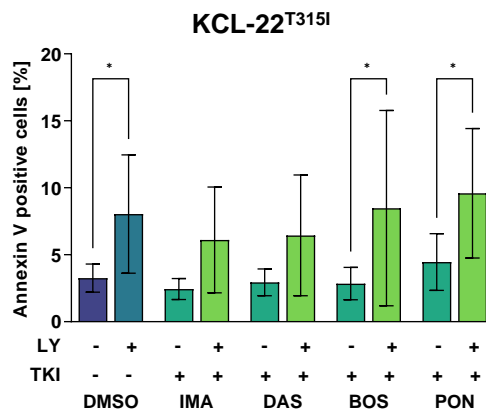

**Supplemental Figure S1**

**S1A** Expression of *Ikba*, *NF-κB*, and *A20*-mRNA in BCR-ABL-negative control- and BCR-ABL-positive murine myeloid progenitor 32Dcl3 cells is shown as % of *Gapdh*. Cells were treated using 0.05 ng/ml TNF and/or 50 nM NIL for 30 min. One representative of n=3 is shown. **S1B** Human CML KCL-22 cells were treated using LY (10 μM), IM (1 μM), DAS (10 nM) or LY+IM, and LY+DAS, in the presence of 1 ng/ml TNF for 16h. Expression of *NF-κB*-target gene *A20* was analyzed via qRT-PCR. Shown are mean values of n=3, normalized to DMSO control. **S1C** Flow cytometry analyses of AnnexinV-positive KCL-22<sup>T3151</sup> cells upon 48h of treatment using LY (5 μM), IM (1 μM), LY+IM, DAS (10 nM), LY+DAS, BOS (5 nM), LY+BOS, PON (5 nM), LY+PON in the presence of TNF (1 ng/ml; n=3). Mean ± SD, significances were calculated using one-way ANOVA. \*p<0.05, \*\*p<0.01, \*\*\*p<0.001, \*\*\*\*p<0.0001

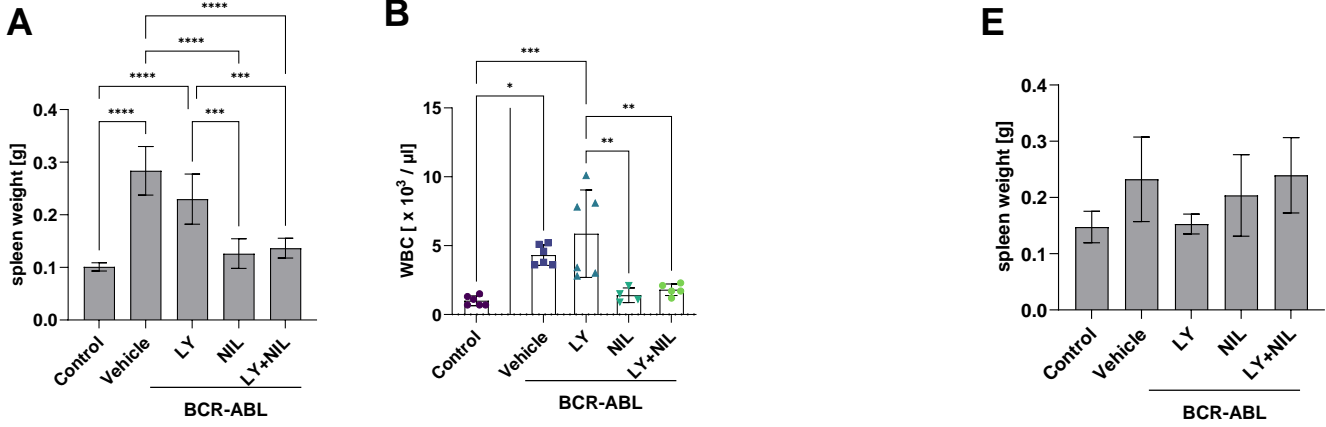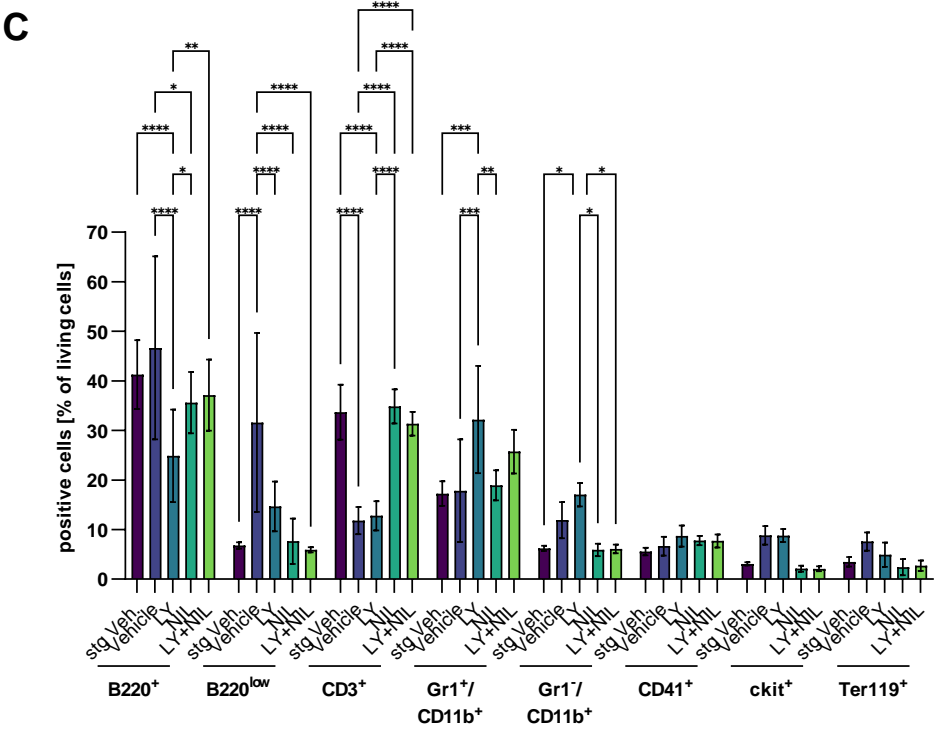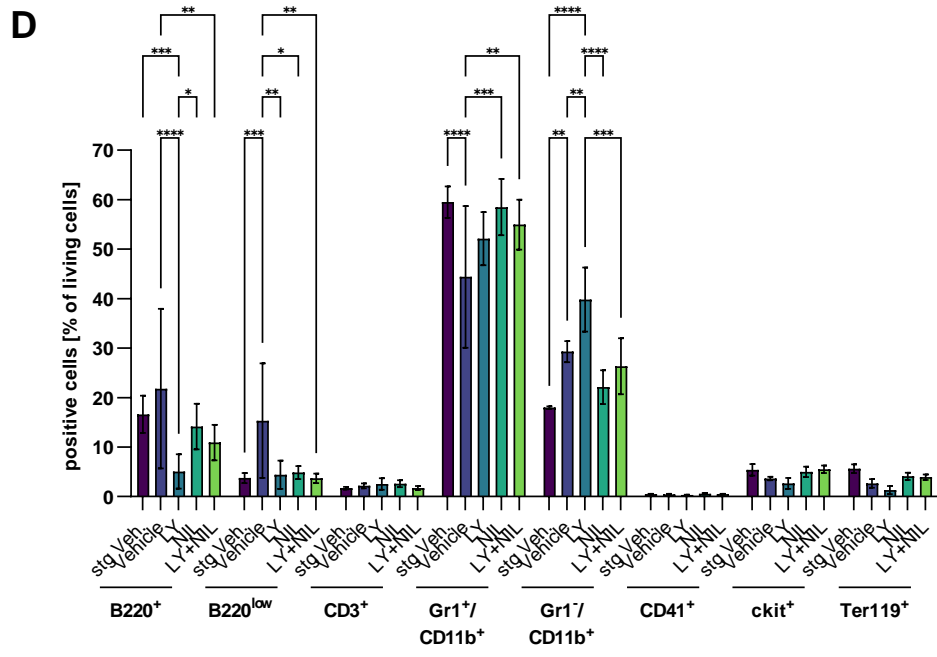

**Supplemental Figure S2**

**S1A** Spleen weight [g] upon final analysis of primary recipients, that were treated using the indicated drugs. **S1B** White blood cell count (WBC) upon final analysis. **S1C** FACS-positive cells in spleen and BM (**S1D**), shown as % of living cells for B-cells (B220<sup>+</sup>), immature B-cells (B220<sup>low</sup>), T-cells (CD3<sup>+</sup>), granulocytes (Gr1<sup>+</sup>/CD11b<sup>+</sup>), immature granulocytes (Gr1<sup>-</sup>/CD11b<sup>+</sup>), megakaryocytes (CD41<sup>+</sup>), ckit<sup>+</sup>-positive cells, and erythrocytes (Ter119<sup>+</sup>). **S1E** Spleen weight [g] upon final analysis of secondary recipients. Mean ± SD, level of significance was calculated using one-way ANOVA. \*p<0.05, \*\*p<0.01, \*\*\*p<0.001, \*\*\*\*p<0.0001

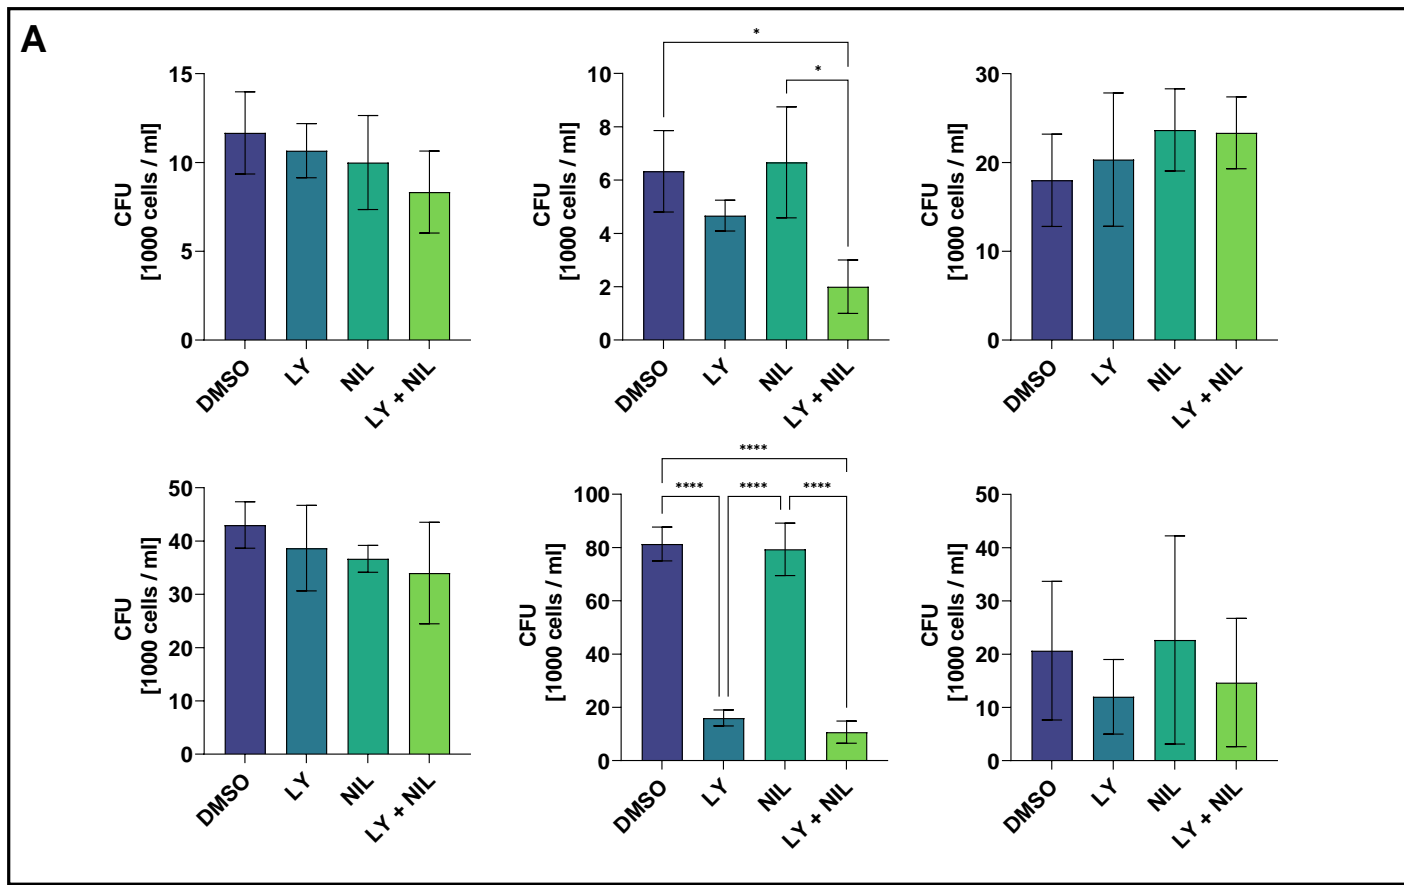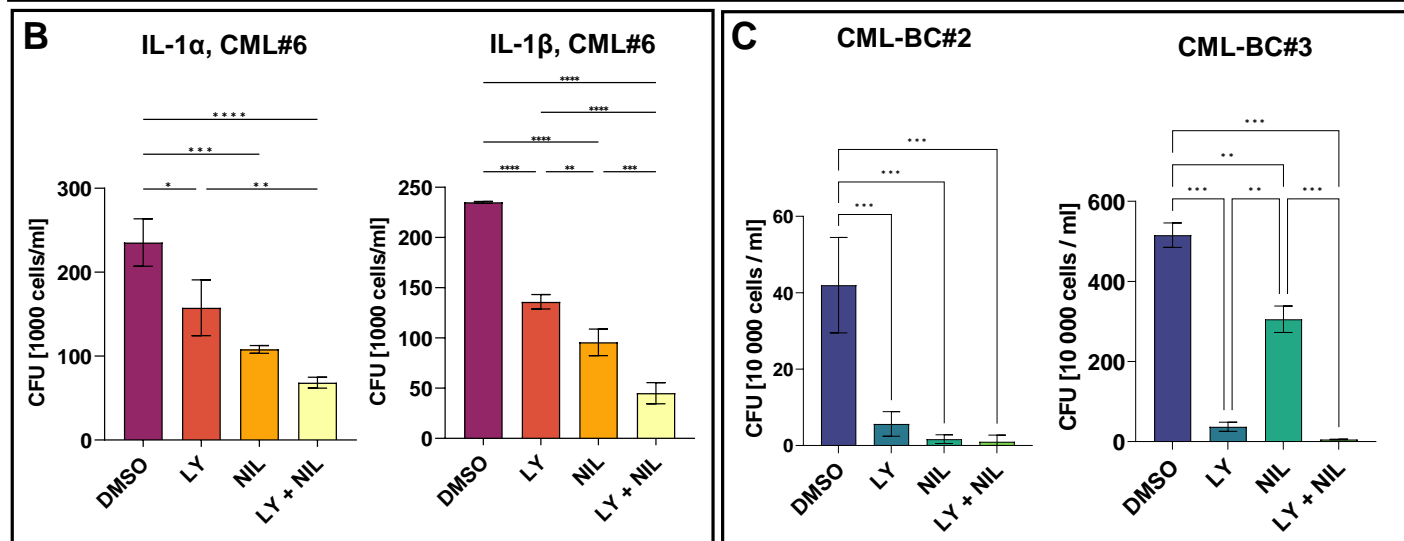

**Supplemental Figure S3**  
**S3A** Healthy donor CD34+ cells were isolated from femoral heads and were treated for 72 h using LY (10  $\mu$ M), NIL (50 nM), LY+NIL, or DMSO control, in the presence of 1 ng/ml TNF. Subsequently, cells were seeded in methylcellulose and colonies were counted on day 10. **S3B** CFU-assays using CML-CP patient derived BM CD34+ cells after treatment using LY (10  $\mu$ M), NIL (50 nM), LY+NIL, or DMSO control, in the presence of IL-1 $\alpha$  (2.5 ng/ml, left panel) or IL-1 $\beta$  (3.5 ng/ml, right panel) for 72 h. One patient is presented as an example out of n=3. **S3C** CFU-assays of BC patient derived mononucleated BM being treated for 72 h using LY (10  $\mu$ M), NIL (50 nM), LY+NIL, or DMSO control, in the presence of TNF (1 ng/ml). Mean  $\pm$  SD, level of significance was calculated using one-way ANOVA. \*p<0.05, \*\*p<0.01, \*\*\*p<0.001, \*\*\*\*p<0.0001
